# Supplementary material for: Hematologic adverse events following palbociclib dose reduction in patients with hormone receptor–positive/human epidermal growth factor receptor 2–negative advanced breast cancer: pooled analysis from randomized phase 2 and 3 studies
Source: PubMed Central journal article supplement (PMC7068918; doi:10.1186/s13058-020-01263-0), 2020-03-12
Supplement: 13058_2020_1263_MOESM1_ESM.pdf [file 13058_2020_1263_MOESM1_ESM.pdf]

**Supplementary Table 1. Summary of the PALOMA Clinical Trial Data.**

|                                                                  | <b>PALOMA-1*</b><br><b>N=165</b> |                           | <b>PALOMA-2†</b><br><b>N=666</b> |                                | <b>PALOMA-3‡</b><br><b>N=521</b>       |                                |
|------------------------------------------------------------------|----------------------------------|---------------------------|----------------------------------|--------------------------------|----------------------------------------|--------------------------------|
| <b>Patient population</b>                                        | First-line<br>ER+/HER2- ABC      |                           | First-line<br>ER+/HER2- ABC      |                                | Second- or later-line<br>HR+/HER2- ABC |                                |
| <b>Treatment arms</b>                                            | <b>PAL+LET</b><br><b>n=84</b>    | <b>LET</b><br><b>n=81</b> | <b>PAL+LET</b><br><b>n=444</b>   | <b>PBO+LET</b><br><b>n=222</b> | <b>PAL+FUL</b><br><b>n=347</b>         | <b>PBO+FUL</b><br><b>n=174</b> |
| <b>Median PFS, mo</b>                                            | 20.2                             | 10.2                      | 27.6                             | 14.5                           | 11.2                                   | 4.6                            |
| <b>Hazard ratio</b>                                              | 0.488                            |                           | 0.563                            |                                | 0.50                                   |                                |
| <b>95% CI</b>                                                    | 0.319–0.748                      |                           | 0.461–0.687                      |                                | 0.40–0.62                              |                                |
| <b>P value</b>                                                   | P=0.0004                         |                           | P<0.000001                       |                                | P<0.0001                               |                                |
| <b>Most common AE in the PAL arm</b>                             | Neutropenia                      |                           | Neutropenia                      |                                | Neutropenia                            |                                |
| <b>Median palbociclib dose intensity (range), %<sup>  </sup></b> | 100<br>(95–100)                  | NA                        | 93.0<br>(40–110)                 | 99.6<br>(56–105)               | 89.8<br>(22–107)                       | 100<br>(80–100)                |

ABC=advanced breast cancer; AE=adverse event; CI=confidence interval; ER+=estrogen receptor-positive; FUL=fulvestrant; HER2-=human epidermal growth factor receptor 2-negative; HR+=hormone receptor-positive; LET=letrozole; NA=not available; PAL=palbociclib; PBO=placebo; PFS=progression-free survival.

\*From Finn et al. *Lancet Oncol.* 2015;16:25-35.

†From Rugo et al. *Breast Cancer Res Treat.* 2019;174(3):719-729.

‡From Turner et al. *N Engl J Med.* 2018;379:1926-1936.

<sup>||</sup>From Diéras et al. *J Natl Cancer Inst.* 2019;11(4):419-430.

**Supplementary Table 2. Schedule of Per Protocol Palbociclib Dose Reductions and Modifications.**

|                                                                                                                                                  | <b>PALOMA-1<br/>N=165</b>   | <b>PALOMA-2<br/>N=666</b>                                                                           | <b>PALOMA-3<br/>N=521</b>                                                                                                                                       |
|--------------------------------------------------------------------------------------------------------------------------------------------------|-----------------------------|-----------------------------------------------------------------------------------------------------|-----------------------------------------------------------------------------------------------------------------------------------------------------------------|
| Uncomplicated grade 3 neutropenia (ANC <1000/mm <sup>3</sup> )                                                                                   | ---                         | No dose adjustments                                                                                 | Dose reduction 1 dose level if neutrophil recovery is delayed beyond 7 days*,†                                                                                  |
| Grade 3 neutropenia (ANC <1000/mm <sup>3</sup> ) associated with a documented infection or fever ≥38.5°C                                         | Dose reduction 1 dose level | Dose reduction 1 dose level                                                                         | Dose reduction 1 dose level; dose reduction 2 dose levels‡ if neutrophil recovery is delayed beyond 7 days*                                                     |
| Grade 4 neutropenia (ANC <500/mm <sup>3</sup> )                                                                                                  | Dose reduction 1 dose level | Dose reduction 1 dose level                                                                         | Dose reduction 1 dose level; dose reduction 2 dose levels‡ in case of recurrent grade 4 event*                                                                  |
| Grade 3 or 4 <sup>  </sup> thrombocytopenia (platelet count <50,000/mm <sup>3</sup> )                                                            | Dose reduction 1 dose level | Dose reduction 1 dose level                                                                         | Dose reduction 1 dose level; dose reduction 2 dose levels‡ in case of recurrent grade ≥3 event                                                                  |
| Grade ≥3 non-hematologic toxicity (including, nausea, vomiting, diarrhea, and hypertension only if persisting despite optimal medical treatment) | Dose reduction 1 dose level | Dose reduction 1 dose level                                                                         | Dose reduction 1 dose level; dose reduction 2 dose levels‡ if repeated toxicity is seen in the next cycle or if recovery from grade 3 is delayed beyond 7 days* |
| Grade 3 QTc prolongation (QTc ≥501 msec on at least 2 separate ECGs)                                                                             | ---                         | Dose interruption until QTc <501 msec; resume at same dose level if reversible cause identified and | Dose interruption until QTc <501 msec; resume at same dose level if reversible cause identified and                                                             |

|  |  |                                                            |                                                            |
|--|--|------------------------------------------------------------|------------------------------------------------------------|
|  |  | at next lower dose if<br>no reversible cause<br>identified | at next lower dose if<br>no reversible cause<br>identified |
|--|--|------------------------------------------------------------|------------------------------------------------------------|

ANC=absolute neutrophil count; ECG=electrocardiogram.

\*If recovery of neutrophils to  $\geq 1000/\text{mm}^3$  or platelet count to  $\geq 50,000/\text{mm}^3$  takes longer than 2 weeks (which may include dose holding due to toxicity, the scheduled week off treatment and up to 7 days of cycle delay), then reduce by 2 dose levels.

†If uncomplicated grade 3 neutropenia recurs in 2 consecutive cycles, after recovery as per retreatment criteria (ANC  $\geq 1000/\text{mm}^3$  and no fever), treatment may restart at the next lower dose level at investigator's discretion.

‡If no further dose reduction is possible (ie, patient is already receiving 75 mg/d according to schedule 3/1) consider changing the schedule to 75 mg/d 2 weeks on/2 weeks off, or discontinue palbociclib/placebo and continue with fulvestrant alone.

§Dose reduction occurred with grade 4 thrombocytopenia (platelet count  $< 25,000/\text{mm}^3$ ) for PALOMA-1 and PALOMA-2.

**Supplementary Table 3. Time Points for Assessing Frequency of AEs Both Before and After Palbociclib Dose Reductions.**

| <b>AE Assessment Period</b>  |                                                  |
|------------------------------|--------------------------------------------------|
| <b>Before Dose Reduction</b> | AEs reported within 30 days before reduction     |
| <b>After Dose Reduction</b>  |                                                  |
| Cycle 1                      | AEs reported within 28 days after dose reduction |
| Cycle 2                      | AEs reported 29–56 days after dose reduction     |
| Cycle 3                      | AEs reported 57–84 days after dose reduction     |
| Cycle 4                      | AEs reported 85–112 days after dose reduction    |
| Cycle 5                      | AEs reported 113–140 days after dose reduction   |
| Cycle 6                      | AEs reported 141–168 days after dose reduction   |

AE=adverse event.

**Supplementary Table 4. Incidence of Hematologic Adverse Events Before/After Palbociclib Dose Reduction From 125 to 100 mg: Asian/non-Asian.**

| Adverse Event                       | Before Dose Reduction |               |              |                 |              |            |                 |              |            | After Dose Reduction |              |            |                 |              |            |                 |              |            |                 |              |            |
|-------------------------------------|-----------------------|---------------|--------------|-----------------|--------------|------------|-----------------|--------------|------------|----------------------|--------------|------------|-----------------|--------------|------------|-----------------|--------------|------------|-----------------|--------------|------------|
|                                     | Before (N=77)         |               |              | Cycle 1 (N=77)  |              |            | Cycle 2 (N=68)  |              |            | Cycle 3 (N=62)       |              |            | Cycle 4 (N=58)  |              |            | Cycle 5 (N=56)  |              |            | Cycle 6 (N=52)  |              |            |
|                                     | Grade, n (%)          |               |              | Grade, n (%)    |              |            | Grade, n (%)    |              |            | Grade, n (%)         |              |            | Grade, n (%)    |              |            | Grade, n (%)    |              |            | Grade, n (%)    |              |            |
|                                     | All                   | 3             | 4            | All             | 3            | 4          | All             | 3            | 4          | All                  | 3            | 4          | All             | 3            | 4          | All             | 3            | 4          | All             | 3            | 4          |
| <b>Neutropenia*</b>                 | 76<br>(98.7)          | 52<br>(67.5)  | 21<br>(27.3) | 50<br>(64.9)    | 35<br>(45.5) | 4<br>(5.2) | 46<br>(67.6)    | 34<br>(50.0) | 3<br>(4.4) | 38<br>(61.3)         | 24<br>(38.7) | 4<br>(6.5) | 35<br>(60.3)    | 20<br>(34.5) | 4<br>(6.9) | 34<br>(60.7)    | 19<br>(33.9) | 1<br>(1.8) | 34<br>(65.4)    | 21<br>(40.4) | 1<br>(1.9) |
| <b>Leukopenia<sup>†</sup></b>       | 27<br>(35.1)          | 20<br>(26.0)  | 0            | 21<br>(27.3)    | 7<br>(9.1)   | 0          | 16<br>(23.5)    | 4<br>(5.9)   | 0          | 13<br>(21.0)         | 5<br>(8.1)   | 0          | 11<br>(19.0)    | 3<br>(5.2)   | 0          | 11<br>(19.6)    | 3<br>(5.4)   | 0          | 14<br>(26.9)    | 7<br>(13.5)  | 0          |
| <b>Thrombocytopenia<sup>‡</sup></b> | 17<br>(22.1)          | 3 (3.9)       | 0            | 9<br>(11.7)     | 1<br>(1.3)   | 0          | 9<br>(13.2)     | 1<br>(1.5)   | 0          | 6<br>(9.7)           | 0            | 0          | 6<br>(10.3)     | 0            | 0          | 7<br>(12.5)     | 0            | 0          | 7<br>(13.5)     | 1<br>(1.9)   | 0          |
| <b>Anemia<sup>§</sup></b>           | 10<br>(13.0)          | 2 (2.6)       | 0            | 15<br>(19.5)    | 2<br>(2.6)   | 0          | 14<br>(20.6)    | 1<br>(1.5)   | 0          | 12<br>(19.4)         | 1<br>(1.6)   | 0          | 11<br>(19.0)    | 1<br>(1.7)   | 0          | 10<br>(17.9)    | 1<br>(1.8)   | 0          | 10<br>(19.2)    | 1<br>(1.9)   | 0          |
| <b>Febrile neutropenia</b>          | 1<br>(1.3)            | 1 (1.3)       | 0            | 0               | 0            | 0          | 0               | 0            | 0          | 0                    | 0            | 0          | 0               | 0            | 0          | 1<br>(1.8)      | 1<br>(1.8)   | 0          | 0               | 0            | 0          |
|                                     | Before (N=234)        |               |              | Cycle 1 (N=233) |              |            | Cycle 2 (N=216) |              |            | Cycle 3 (N=205)      |              |            | Cycle 4 (N=195) |              |            | Cycle 5 (N=185) |              |            | Cycle 6 (N=176) |              |            |
|                                     | Grade, n (%)          |               |              | Grade, n (%)    |              |            | Grade, n (%)    |              |            | Grade, n (%)         |              |            | Grade, n (%)    |              |            | Grade, n (%)    |              |            | Grade, n (%)    |              |            |
| Adverse Event                       | All                   | 3             | 4            | All             | 3            | 4          | All             | 3            | 4          | All                  | 3            | 4          | All             | 3            | 4          | All             | 3            | 4          | All             | 3            | 4          |
| <b>Neutropenia*</b>                 | 200<br>(85.5)         | 154<br>(65.8) | 33<br>(14.1) | 143<br>(61.4)   | 75<br>(32.2) | 5<br>(2.1) | 146<br>(67.6)   | 83<br>(38.4) | 6<br>(2.8) | 127<br>(62.0)        | 69<br>(33.7) | 5<br>(2.4) | 125<br>(64.1)   | 71<br>(36.4) | 2<br>(1.0) | 108<br>(58.4)   | 54<br>(29.2) | 6<br>(3.2) | 104<br>(59.1)   | 63<br>(35.8) | 1<br>(0.6) |
| <b>Leukopenia<sup>†</sup></b>       | 103<br>(44.0)         | 66<br>(28.2)  | 2<br>(0.9)   | 67<br>(28.8)    | 18<br>(7.7)  | 0          | 67<br>(31.0)    | 18<br>(8.3)  | 0          | 58<br>(28.3)         | 17<br>(8.3)  | 0          | 53<br>(27.2)    | 14<br>(7.2)  | 0          | 49<br>(26.5)    | 9<br>(4.9)   | 0          | 42<br>(23.9)    | 8<br>(4.5)   | 0          |
| <b>Thrombocytopenia<sup>‡</sup></b> | 31<br>(13.2)          | 2 (0.9)       | 1<br>(0.4)   | 27<br>(11.6)    | 2<br>(0.9)   | 0          | 20<br>(9.3)     | 2<br>(0.9)   | 0          | 17<br>(8.3)          | 2<br>(1.0)   | 0          | 15<br>(7.7)     | 2<br>(1.0)   | 0          | 13<br>(7.0)     | 0            | 0          | 13<br>(7.4)     | 0            | 0          |
| <b>Anemia<sup>§</sup></b>           | 28<br>(12.0)          | 6 (2.6)       | 0            | 40<br>(17.2)    | 3<br>(1.3)   | 0          | 40<br>(18.5)    | 2<br>(0.9)   | 0          | 37<br>(18.0)         | 1<br>(0.5)   | 0          | 32<br>(16.4)    | 1<br>(0.5)   | 0          | 28<br>(15.1)    | 1<br>(0.5)   | 0          | 29<br>(16.5)    | 0            | 0          |
| <b>Febrile neutropenia</b>          | 6<br>(2.6)            | 5 (2.1)       | 1<br>(0.4)   | 0               | 0            | 0          | 0               | 0            | 0          | 0                    | 0            | 0          | 0               | 0            | 0          | 0               | 0            | 0          | 0               | 0            | 0          |

\*Neutropenia includes the following Preferred Terms: Neutropenia or Neutrophil count decreased.

<sup>†</sup>Leukopenia includes the following Preferred Terms: Leukopenia or White blood cell count decreased.

<sup>‡</sup>Thrombocytopenia includes the following Preferred Terms: Platelet count decreased or Thrombocytopenia.

<sup>§</sup>Anemia includes the following Preferred Terms: Anemia or Hematocrit decreased or Hemoglobin decreased.

**Supplementary Table 5. Incidence of Hematologic Adverse Events Before/After Palbociclib Dose Reduction From 125 to 100 mg: BMI.**

| Before Dose Reduction         |                |              |              |                 |              |            | After Dose Reduction |              |            |                 |              |            |                 |              |            |                 |              |            |                |              |            |
|-------------------------------|----------------|--------------|--------------|-----------------|--------------|------------|----------------------|--------------|------------|-----------------|--------------|------------|-----------------|--------------|------------|-----------------|--------------|------------|----------------|--------------|------------|
| BMI ≤25 kg/m <sup>2</sup>     | Before (N=137) |              |              | Cycle 1 (N=136) |              |            | Cycle 2 (N=121)      |              |            | Cycle 3 (N=113) |              |            | Cycle 4 (N=106) |              |            | Cycle 5 (N=101) |              |            | Cycle 6 (N=94) |              |            |
|                               | Grade, n (%)   |              |              | Grade, n (%)    |              |            | Grade, n (%)         |              |            | Grade, n (%)    |              |            | Grade, n (%)    |              |            | Grade, n (%)    |              |            | Grade, n (%)   |              |            |
| Adverse Event                 | All            | 3            | 4            | All             | 3            | 4          | All                  | 3            | 4          | All             | 3            | 4          | All             | 3            | 4          | All             | 3            | 4          | All            | 3            | 4          |
| Neutropenia*                  | 124<br>(90.5)  | 89<br>(65.0) | 30<br>(21.9) | 90<br>(66.2)    | 53<br>(39.0) | 6<br>(4.4) | 84<br>(69.4)         | 51<br>(42.1) | 6<br>(5.0) | 69<br>(61.1)    | 41<br>(36.3) | 2<br>(1.8) | 68<br>(64.2)    | 35<br>(33.0) | 5<br>(4.7) | 55<br>(54.5)    | 24<br>(23.8) | 4<br>(4.0) | 61<br>(64.9)   | 40<br>(42.6) | 2<br>(2.1) |
| Leukopenia <sup>†</sup>       | 60<br>(43.8)   | 41<br>(29.9) | 0            | 37<br>(27.2)    | 8<br>(5.9)   | 0          | 33<br>(27.3)         | 9<br>(7.4)   | 0          | 30<br>(26.5)    | 9<br>(8.0)   | 0          | 27<br>(25.5)    | 5<br>(4.7)   | 0          | 20<br>(19.8)    | 2<br>(2.0)   | 0          | 25<br>(26.6)   | 8<br>(8.5)   | 0          |
| Thrombocytopenia <sup>‡</sup> | 25<br>(18.2)   | 3<br>(2.2)   | 0            | 18<br>(13.2)    | 2<br>(1.5)   | 0          | 16<br>(13.2)         | 2<br>(1.7)   | 0          | 12<br>(10.6)    | 1<br>(0.9)   | 0          | 11<br>(10.4)    | 0            | 0          | 10<br>(9.9)     | 0            | 0          | 11<br>(11.7)   | 1<br>(1.1)   | 0          |
| Anemia <sup>§</sup>           | 20<br>(14.6)   | 4<br>(2.9)   | 0            | 26<br>(19.1)    | 2<br>(1.5)   | 0          | 26<br>(21.5)         | 3<br>(2.5)   | 0          | 24<br>(21.2)    | 2<br>(1.8)   | 0          | 20<br>(18.9)    | 2<br>(1.9)   | 0          | 18<br>(17.8)    | 2<br>(2.0)   | 0          | 18<br>(19.1)   | 1<br>(1.1)   | 0          |
| Febrile neutropenia           | 4<br>(2.9)     | 4<br>(2.9)   | 0            | 0               | 0            | 0          | 0                    | 0            | 0          | 0               | 0            | 0          | 0               | 0            | 0          | 1<br>(1.0)      | 1<br>(1.0)   | 0          | 0              | 0            | 0          |
| BMI >25–30 kg/m <sup>2</sup>  | Before (N=97)  |              |              | Cycle 1 (N=97)  |              |            | Cycle 2 (N=88)       |              |            | Cycle 3 (N=84)  |              |            | Cycle 4 (N=80)  |              |            | Cycle 5 (N=76)  |              |            | Cycle 6 (N=74) |              |            |
|                               | Grade, n (%)   |              |              | Grade, n (%)    |              |            | Grade, n (%)         |              |            | Grade, n (%)    |              |            | Grade, n (%)    |              |            | Grade, n (%)    |              |            | Grade, n (%)   |              |            |
| Adverse Event                 | All            | 3            | 4            | All             | 3            | 4          | All                  | 3            | 4          | All             | 3            | 4          | All             | 3            | 4          | All             | 3            | 4          | All            | 3            | 4          |
| Neutropenia*                  | 88<br>(90.7)   | 67<br>(69.1) | 13<br>(13.4) | 58<br>(59.8)    | 32<br>(33.0) | 2<br>(2.1) | 63<br>(71.6)         | 43<br>(48.9) | 1<br>(1.1) | 55<br>(65.5)    | 30<br>(35.7) | 6<br>(7.1) | 54<br>(67.5)    | 34<br>(42.5) | 1<br>(1.3) | 56<br>(73.7)    | 32<br>(42.1) | 3<br>(3.9) | 48<br>(64.9)   | 27<br>(36.5) | 0          |
| Leukopenia <sup>†</sup>       | 41<br>(42.3)   | 28<br>(28.9) | 1<br>(1.0)   | 32<br>(33.0)    | 10<br>(10.3) | 0          | 33<br>(37.5)         | 11<br>(12.5) | 0          | 27<br>(32.1)    | 10<br>(11.9) | 0          | 24<br>(30.0)    | 7<br>(8.8)   | 0          | 27<br>(35.5)    | 7<br>(9.2)   | 0          | 21<br>(28.4)   | 4<br>(5.4)   | 0          |
| Thrombocytopenia <sup>‡</sup> | 14<br>(14.4)   | 1<br>(1.0)   | 0            | 10<br>(10.3)    | 0            | 0          | 9<br>(10.2)          | 0            | 0          | 9<br>(10.7)     | 0            | 0          | 7<br>(8.8)      | 0            | 0          | 8<br>(10.5)     | 0            | 0          | 8<br>(10.8)    | 0            | 0          |
| Anemia <sup>§</sup>           | 13<br>(13.4)   | 3<br>(3.1)   | 0            | 17<br>(17.5)    | 0            | 0          | 18<br>(20.5)         | 0            | 0          | 15<br>(17.9)    | 0            | 0          | 14<br>(17.5)    | 0            | 0          | 12<br>(15.8)    | 0            | 0          | 14<br>(18.9)   | 0            | 0          |
| Febrile neutropenia           | 2<br>(2.1)     | 2<br>(2.1)   | 0            | 1<br>(1.0)      | 0            | 0          | 0                    | 0            | 0          | 0               | 0            | 0          | 0               | 0            | 0          | 0               | 0            | 0          | 0              | 0            | 0          |
| BMI >30 kg/m <sup>2</sup>     | Before (N=76)  |              |              | Cycle 1 (N=76)  |              |            | Cycle 2 (N=75)       |              |            | Cycle 3 (N=70)  |              |            | Cycle 4 (N=67)  |              |            | Cycle 5 (N=64)  |              |            | Cycle 6 (N=60) |              |            |
|                               | Grade, n (%)   |              |              | Grade, n (%)    |              |            | Grade, n (%)         |              |            | Grade, n (%)    |              |            | Grade, n (%)    |              |            | Grade, n (%)    |              |            | Grade, n (%)   |              |            |

| Adverse Event                       | All          | 3            | 4            | All          | 3            | 4          | All          | 3            | 4          | All          | 3            | 4          | All          | 3            | 4 | All          | 3            | 4 | All          | 3            | 4 |
|-------------------------------------|--------------|--------------|--------------|--------------|--------------|------------|--------------|--------------|------------|--------------|--------------|------------|--------------|--------------|---|--------------|--------------|---|--------------|--------------|---|
| <b>Neutropenia*</b>                 | 63<br>(82.9) | 49<br>(64.5) | 11<br>(14.5) | 44<br>(57.9) | 25<br>(32.9) | 1<br>(1.3) | 45<br>(60.0) | 23<br>(30.7) | 2<br>(2.7) | 41<br>(58.6) | 22<br>(31.4) | 1<br>(1.4) | 38<br>(56.7) | 22<br>(32.8) | 0 | 31<br>(48.4) | 17<br>(26.6) | 0 | 29<br>(48.3) | 17<br>(28.3) | 0 |
| <b>Leukopenia<sup>†</sup></b>       | 28<br>(36.8) | 16<br>(21.1) | 1<br>(1.3)   | 19<br>(25.0) | 7<br>(9.2)   | 0          | 17<br>(22.7) | 2<br>(2.7)   | 0          | 14<br>(20.0) | 3<br>(4.3)   | 0          | 13<br>(19.4) | 5<br>(7.5)   | 0 | 13<br>(20.3) | 3<br>(4.7)   | 0 | 10<br>(16.7) | 3<br>(5.0)   | 0 |
| <b>Thrombocytopenia<sup>‡</sup></b> | 9<br>(11.8)  | 1<br>(1.3)   | 1<br>(1.3)   | 8<br>(10.5)  | 1<br>(1.3)   | 0          | 4<br>(5.3)   | 1<br>(1.3)   | 0          | 2<br>(2.9)   | 1<br>(1.4)   | 0          | 3<br>(4.5)   | 2<br>(3.0)   | 0 | 2<br>(3.1)   | 0            | 0 | 1<br>(1.7)   | 0            | 0 |
| <b>Anemia<sup>§</sup></b>           | 5<br>(6.6)   | 1<br>(1.3)   | 0            | 12<br>(15.8) | 3<br>(3.9)   | 0          | 10<br>(13.3) | 0            | 0          | 10<br>(14.3) | 0            | 0          | 9<br>(13.4)  | 0            | 0 | 8<br>(12.5)  | 0            | 0 | 7<br>(11.7)  | 0            | 0 |
| <b>Febrile neutropenia</b>          | 1<br>(1.3)   | 0            | 1<br>(1.3)   | 0            | 0            | 0          | 0            | 0            | 0          | 0            | 0            | 0          | 0            | 0            | 0 | 0            | 0            | 0 | 0            | 0            | 0 |

BMI=body mass index.

\*Neutropenia includes the following Preferred Terms: Neutropenia or Neutrophil count decreased.

<sup>†</sup>Leukopenia includes the following Preferred Terms: Leukopenia or White blood cell count decreased.

<sup>‡</sup>Thrombocytopenia includes the following Preferred Terms: Platelet count decreased or Thrombocytopenia.

<sup>§</sup>Anemia includes the following Preferred Terms: Anemia or Hematocrit decreased or Hemoglobin decreased.

**Supplementary Table 6. Incidence of Hematologic Adverse Events Before/After Palbociclib Dose Reduction From 125 to 100 mg: Age.**

| Adverse Event                       | Before Dose Reduction |               |              |                 |              |            |                 |              |            | After Dose Reduction |              |            |                 |              |            |                 |              |            |                 |              |            |
|-------------------------------------|-----------------------|---------------|--------------|-----------------|--------------|------------|-----------------|--------------|------------|----------------------|--------------|------------|-----------------|--------------|------------|-----------------|--------------|------------|-----------------|--------------|------------|
|                                     | Before (N=192)        |               |              | Cycle 1 (N=192) |              |            | Cycle 2 (N=179) |              |            | Cycle 3 (N=169)      |              |            | Cycle 4 (N=158) |              |            | Cycle 5 (N=147) |              |            | Cycle 6 (N=138) |              |            |
|                                     | All                   | 3             | 4            | All             | 3            | 4          | All             | 3            | 4          | All                  | 3            | 4          | All             | 3            | 4          | All             | 3            | 4          | All             | 3            | 4          |
| <b>Age &lt;65 Years</b>             |                       |               |              |                 |              |            |                 |              |            |                      |              |            |                 |              |            |                 |              |            |                 |              |            |
| <b>Neutropenia*</b>                 | 174<br>(90.6)         | 134<br>(69.8) | 35<br>(18.2) | 124<br>(64.6)   | 65<br>(33.9) | 6<br>(3.1) | 129<br>(72.1)   | 75<br>(41.9) | 7<br>(3.9) | 112<br>(66.3)        | 62<br>(36.7) | 7<br>(4.1) | 100<br>(63.3)   | 55<br>(34.8) | 5<br>(3.2) | 84<br>(57.1)    | 39<br>(26.5) | 4<br>(2.7) | 79<br>(57.2)    | 43<br>(31.2) | 1<br>(0.7) |
| <b>Leukopenia<sup>†</sup></b>       | 83<br>(43.2)          | 55<br>(28.6)  | 2<br>(1.0)   | 58<br>(30.2)    | 15<br>(7.8)  | 0          | 57<br>(31.8)    | 14<br>(7.8)  | 0          | 51<br>(30.2)         | 14<br>(8.3)  | 0          | 44<br>(27.8)    | 9<br>(5.7)   | 0          | 41<br>(27.9)    | 7<br>(4.8)   | 0          | 37<br>(26.8)    | 8<br>(5.8)   | 0          |
| <b>Thrombocytopenia<sup>‡</sup></b> | 26<br>(13.5)          | 2<br>(1.0)    | 1<br>(0.5)   | 21<br>(10.9)    | 1<br>(0.5)   | 0          | 17<br>(9.5)     | 1<br>(0.6)   | 0          | 15<br>(8.9)          | 1<br>(0.6)   | 0          | 14<br>(8.9)     | 1<br>(0.6)   | 0          | 13<br>(8.8)     | 0            | 0          | 12<br>(8.7)     | 1<br>(0.7)   | 0          |
| <b>Anemia<sup>§</sup></b>           | 18<br>(9.4)           | 5<br>(2.6)    | 0            | 31<br>(16.1)    | 3<br>(1.6)   | 0          | 31<br>(17.3)    | 3<br>(1.7)   | 0          | 29<br>(17.2)         | 2<br>(1.2)   | 0          | 24<br>(15.2)    | 1<br>(0.6)   | 0          | 19<br>(12.9)    | 1<br>(0.7)   | 0          | 21<br>(15.2)    | 1<br>(0.7)   | 0          |
| <b>Febrile neutropenia</b>          | 4<br>(2.1)            | 3<br>(1.6)    | 1<br>(0.5)   | 0               | 0            | 0          | 0               | 0            | 0          | 0                    | 0            | 0          | 0               | 0            | 0          | 1<br>(0.7)      | 1<br>(0.7)   | 0          | 0               | 0            | 0          |
| <b>Age ≥65 Years</b>                |                       |               |              |                 |              |            |                 |              |            |                      |              |            |                 |              |            |                 |              |            |                 |              |            |
| <b>Neutropenia*</b>                 | 102<br>(85.7)         | 72<br>(60.5)  | 19<br>(16.0) | 69<br>(58.5)    | 45<br>(38.1) | 3<br>(2.5) | 63<br>(60.0)    | 42<br>(40.0) | 2<br>(1.9) | 53<br>(54.1)         | 31<br>(31.6) | 2<br>(2.0) | 60<br>(63.2)    | 36<br>(37.9) | 1<br>(1.1) | 58<br>(61.7)    | 34<br>(36.2) | 3<br>(3.2) | 59<br>(65.6)    | 41<br>(45.6) | 1<br>(1.1) |
| <b>Leukopenia<sup>†</sup></b>       | 47<br>(39.5)          | 31<br>(26.1)  | 0            | 30<br>(25.4)    | 10<br>(8.5)  | 0          | 26<br>(24.8)    | 8<br>(7.6)   | 0          | 20<br>(20.4)         | 8<br>(8.2)   | 0          | 20<br>(21.1)    | 8<br>(8.4)   | 0          | 19<br>(20.2)    | 5<br>(5.3)   | 0          | 19<br>(21.1)    | 7<br>(7.8)   | 0          |
| <b>Thrombocytopenia<sup>‡</sup></b> | 22<br>(18.5)          | 3<br>(2.5)    | 0            | 15<br>(12.7)    | 2<br>(1.7)   | 0          | 12<br>(11.4)    | 2<br>(1.9)   | 0          | 8<br>(8.2)           | 1<br>(1.0)   | 0          | 7<br>(7.4)      | 1<br>(1.1)   | 0          | 7<br>(7.4)      | 0            | 0          | 8<br>(8.9)      | 0            | 0          |
| <b>Anemia<sup>§</sup></b>           | 20<br>(16.8)          | 3<br>(2.5)    | 0            | 24<br>(20.3)    | 2<br>(1.7)   | 0          | 23<br>(21.9)    | 0            | 0          | 20<br>(20.4)         | 0            | 0          | 19<br>(20.0)    | 1<br>(1.1)   | 0          | 19<br>(20.2)    | 1<br>(1.1)   | 0          | 18<br>(20.0)    | 0            | 0          |
| <b>Febrile neutropenia</b>          | 3<br>(2.5)            | 3<br>(2.5)    | 0            | 0               | 0            | 0          | 0               | 0            | 0          | 0                    | 0            | 0          | 0               | 0            | 0          | 0               | 0            | 0          | 0               | 0            | 0          |

\*Neutropenia includes the following Preferred Terms: Neutropenia or Neutrophil count decreased.  
<sup>†</sup>Leukopenia includes the following Preferred Terms: Leukopenia or White blood cell count decreased.  
<sup>‡</sup>Thrombocytopenia includes the following Preferred Terms: Platelet count decreased or Thrombocytopenia.  
<sup>§</sup>Anemia includes the following Preferred Terms: Anemia or Hematocrit decreased or Hemoglobin decreased.



**Supplementary Figure 1. Study Design of PALOMA-1, PALOMA-2, and PALOMA-3.**

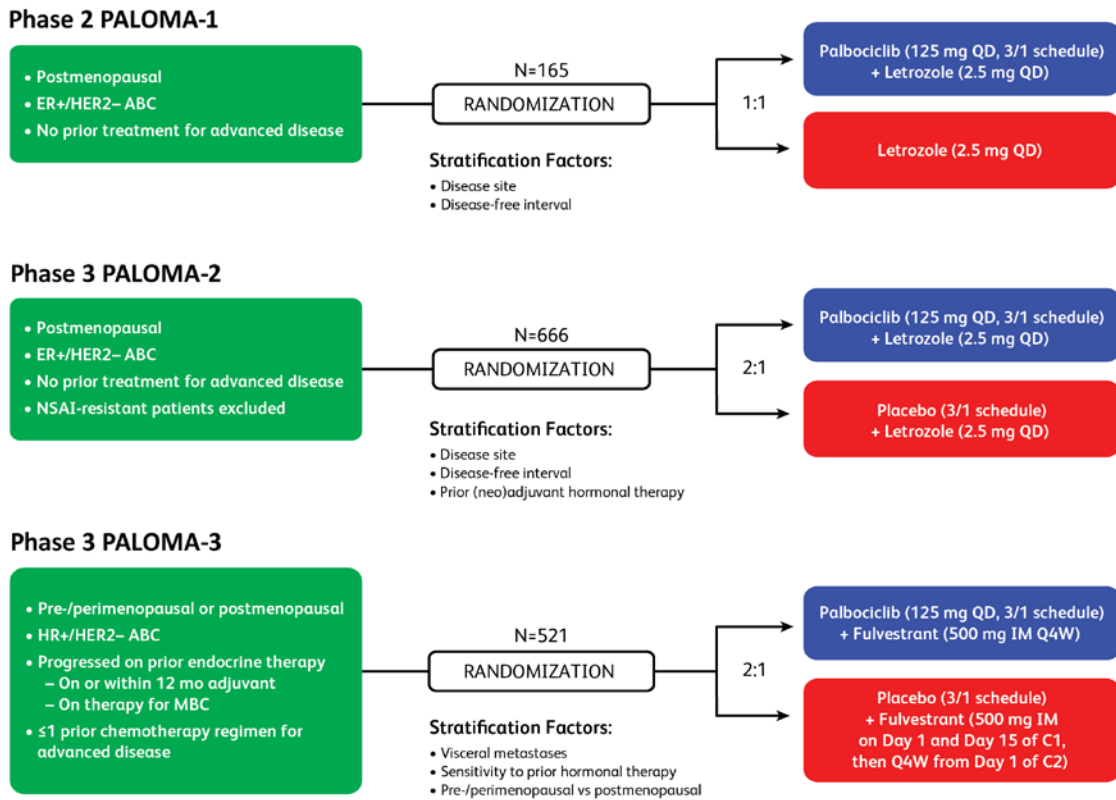

ABC=advanced breast cancer; C=cycle; D=day; ER+=estrogen receptor-positive; HER2-=human epidermal growth factor receptor 2-negative; HR+=hormone receptor-positive; IM=intramuscular; MBC=metastatic breast cancer; NSAI=nonsteroidal aromatase inhibitor; QD=once daily; Q4W=every 4 weeks.
